## RESEARCH ARTICLE

# Psychological distress, fear and coping among Malaysians during the COVID-19 pandemic

Ahmed Suparno Bahar Moni<sup>1\*</sup>, Shalimar Abdullah<sup>2</sup>, Mohammad Farris Iman Leong Bin Abdullah<sup>1</sup>, Mohammed Shahjahan Kabir<sup>3</sup>, Sheikh M. Alif<sup>4</sup>, Farhana Sultana<sup>5,6</sup>, Masudus Salehin<sup>7</sup>, Sheikh Mohammed Shariful Islam<sup>8</sup>, Wendy Cross<sup>7</sup>, Muhammad Aziz Rahman<sup>7,9,10,11\*</sup>

**1** Advanced Medical and Dental Institute, Universiti Sains Malaysia, Bertam, Kepala Batas, Penang, Malaysia, **2** Faculty of Medicine, Pusat Perubatan Universiti Kebangsaan Malaysia, Kuala Lumpur, Malaysia, **3** Faculty of Medicine, Qest International University, Ipoh, Perak, Malaysia, **4** School of Public Health and Preventive Medicine, Monash University, Melbourne, Victoria, Australia, **5** Telstra Health, Melbourne, Victoria, Australia, **6** Melbourne School of Population and Global Health, University of Melbourne, Carlton, Victoria, Australia, **7** School of Health, Federation University Australia, Berwick, Victoria, Australia, **8** Institute for Physical Activity and Nutrition, Deakin University, Burwood, Victoria, Australia, **9** Australian Institute for Primary Care and Ageing, La Trobe University, Melbourne, Victoria, Australia, **10** Department of Noncommunicable Diseases, Bangladesh University of Health Sciences (BUHS), Dhaka, Bangladesh, **11** Faculty of Public Health, Universitas Airlangga, Surabaya, Indonesia

\* [suparno1978@gmail.com](mailto:suparno1978@gmail.com) (ASBM); [ma.rahman@federation.edu.au](mailto:ma.rahman@federation.edu.au) (MAR)

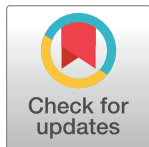

## OPEN ACCESS

**Citation:** Bahar Moni AS, Abdullah S, Bin Abdullah MFIL, Kabir MS, Alif SM, Sultana F, et al. (2021) Psychological distress, fear and coping among Malaysians during the COVID-19 pandemic. PLoS ONE 16(9): e0257304. <https://doi.org/10.1371/journal.pone.0257304>

**Editor:** Alessio Gori, Università degli Studi di Firenze: Università degli Studi di Firenze, ITALY

**Received:** December 29, 2020

**Accepted:** August 30, 2021

**Published:** September 10, 2021

**Peer Review History:** PLOS recognizes the benefits of transparency in the peer review process; therefore, we enable the publication of all of the content of peer review and author responses alongside final, published articles. The editorial history of this article is available here: <https://doi.org/10.1371/journal.pone.0257304>

**Copyright:** © 2021 Bahar Moni et al. This is an open access article distributed under the terms of the [Creative Commons Attribution License](https://creativecommons.org/licenses/by/4.0/), which permits unrestricted use, distribution, and reproduction in any medium, provided the original author and source are credited.

**Data Availability Statement:** All relevant data are within the paper.

**Funding:** Telstra Health provided support in the form of salary for author FS. However, the authors

## Abstract

### Introduction

The COVID-19 pandemic has enormously affected the psychological well-being, social and working life of millions of people across the world. This study aimed to investigate the psychological distress, fear and coping strategies as a result of the COVID-19 pandemic and its associated factors among Malaysian residents.

### Methods

Participants were invited to an online cross-sectional survey from Aug-Sep 2020. The study assessed psychological distress using the Kessler Psychological Distress Scale, level of fear using the Fear of COVID-19 Scale, and coping strategies using the Brief Resilient Coping Scale. Univariate and multivariate logistic regression analyses were conducted to adjust for potential confounders.

### Results

The mean age ( $\pm$ SD) of the participants (N = 720) was 31.7 ( $\pm$ 11.5) years, and most of them were females (67.1%). Half of the participants had an income source, while 216 (30%) identified themselves as frontline health or essential service workers. People whose financial situation was impacted due to COVID-19 (AOR 2.16, 95% CIs 1.54–3.03), people who drank alcohol in the last four weeks (3.43, 1.45–8.10), people who were a patient (2.02, 1.39–2.93), and had higher levels of fear of COVID-19 (2.55, 1.70–3.80) were more likely to have higher levels of psychological distress. Participants who self-isolated due to exposure to COVID-19 (3.12, 1.04–9.32) and who had moderate to very high levels of psychological

did not receive direct or specific funding for this work. The specific roles of this author is articulated in the 'author contributions' section.

**Competing interests:** The authors have read the journal's policy and have the following competing interests: RS is a staff member of Telstra Health (<https://www.telstrahealth.com/>). There are no patents, products in development or marketed products associated with this research to declare. This does not alter our adherence to PLOS ONE policies on sharing data and materials.

distress (2.56, 1.71–3.83) had higher levels of fear. Participants who provided care to a family member/patient with a suspected case of COVID-19 were more likely to be moderately to highly resilient compared to those who did not.

## Conclusion

Vulnerable groups of individuals such as patients and those impacted financially during COVID-19 should be supported for their mental wellbeing. Behavioural interventions should be targeted to reduce the impact of alcohol drinking during such crisis period.

## Introduction

The world is currently facing a pandemic due to the rapid spread of coronavirus disease 2019 (COVID-19), caused by severe acute respiratory syndrome coronavirus 2 (SARS-CoV-2). As of 23<sup>rd</sup> March 2021, an estimated 124,291,475 confirmed cases and around 2,735,205 deaths have been attributed to COVID-19 affecting more than 219 countries and territories across the world [1]. Malaysia has reported 334,156 confirmed cases with 1,238 cumulative deaths with a case fatality rate of 0.4% [1]. Although the case fatality rate was low in Malaysia compared to other developed countries like USA or UK, people were anxious as the virus could spread rapidly from one person to another through direct or indirect contact [2].

In Malaysia, the first COVID-19 case was detected on 25 January 2020 [3]. With a surge in cases thereafter, physical distancing rules, restrictions on social gatherings, appropriate use of face masks, Movement Control Order (MCO), Conditional Movement Control Order (CMCO), extended movement control order, and border closures were implemented by the Malaysian Government between mid-March to August-2020 to curb the spread of the disease [4]. However, Malaysia has seen a resurgence of COVID-19 cases and is currently facing a third wave of infection and is under the second CMCO from 9-November-2020 in all states except Perlis, Kelantan, Pahang and Sarawak. Malaysia has launched COVID-19 vaccination program on the 24<sup>th</sup> February 2021 [5]. The impact of all these spatial distancing policies and the uncertainty of returning to normalcy have direct and indirect impact on social life as well as mental wellbeing of the community people. Those interim actions such as MCOs or lockdowns, physical distancing and quarantine have reportedly led to heightened fears, stress and anxiety amongst individuals globally.

A recent review found women, younger individuals, those living in rural areas, those with lower socioeconomic status, those at higher-risk of COVID-19 infection and longer media exposure to be associated with higher levels of anxiety and depression [6]. Individual studies have shown that the COVID-19 pandemic affected people in different countries in different ways with some groups being more vulnerable than others. In Australia, pre-existing mental health conditions, increased smoking and alcohol during the lockdown and high levels of fear and being female were associated with higher levels of psychological distress [7]. Similarly, in the UK, females, younger age, lower annual income, smokers and co-morbidity were associated with poor mental health [8]. While in Italy, female gender, negative affect and detachment were associated with higher levels of stress [9]. In some studies in China, frequent and prolonged social media exposure during the COVID-19 pandemic was found to be strongly associated with anxiety and depression [10].

Previous studies have reported the negative influence of pandemics on psychological wellbeing, which can lead to acute depression and anxiety [7, 11]. Evidence suggests that frontline

healthcare workers, who were directly involved in the collection of samples, diagnosis, treatment, and care of patients during an outbreak were at higher risk of developing psychological distress and mental health symptoms [12]. Previous evidence documented immediate psychological impacts amongst frontline healthcare workers with symptoms of anxiety, distress, depression, fear of spreading infection to family, friends and colleagues [7, 13]. Lower sleep quality due to anxiety and stress, which eventually reduced self-efficacy exponentially among the medical staff has also been reported [14].

Only recently studies have emerged to show the negative impact of the pandemic on children, older people, pregnant women, university students, people with weight issues and the general population as a whole. An Iranian study revealed effect of fear of COVID-19 was significantly associated with depression, anxiety, suicidal intention and mental quality of life among the pregnant women [15]. In a study with older people, fear of COVID-19 significantly mediated the association between perceived health status, and insomnia, mental health and COVID-19 preventative behaviours [16]. A recent study among university students from Indonesia, Taiwan and Thailand found that Thai students had the highest level of anxiety but limited resources to fight the COVID-19 pandemic, whereas Taiwanese students were more negatively affected by information gathering from the internet; such less perceived satisfactory support was associated with more suicidal thoughts among Indonesian students [17]. Stressors of COVID-19 pandemic could also result in behaviour impairments of children and adolescents, which could potentially impact psychological wellbeing in early life and adulthood [18].

Studies on the impact of COVID-19 on mental health are limited in Malaysia and most of them were conducted amongst students. In one study using online survey, out of 983 Malaysian students, 20.4%, 6.6%, and 2.8% experienced minimal to moderate, marked to severe, and most extreme levels of anxiety, respectively. Female gender, age under 18 years, pre-university level of education, management studies, and staying alone were significantly associated with higher levels of anxiety. The main stressors included financial constraints, remote online teaching, and uncertainty about the future regarding study and career also affecting the mental health [2]. In another study amongst Malaysian university students, the prevalence of anxiety was much higher; 30.5% were experiencing mild, 31.1% moderate, and 26.1% severe anxiety; age >20 years, Chinese ethnicity, decreased family income, co-morbid conditions, and spending time watching COVID-related news and infected friends and relatives were found to be associated with increased anxiety [19]. In another study in Malaysia age <25 years and females were more likely to have higher levels of fear of COVID-19; however, 70% of the respondents were also students in this study [20].

There is limited evidence regarding the impact of COVID-19 on psychological distress, fear and coping strategies as a whole and amongst community members and healthcare workers in Malaysia. We, therefore, conducted this study to understand the extent of the mental health burden in the community settings in Malaysia during the COVID-19 pandemic. The study will identify population subgroups more at risk of developing poor mental health outcomes and enable policy makers to guide resource planning and design psychosocial interventions targeted to these high-risk and vulnerable groups of population.

## Materials and methods

### Study design and settings

A cross-sectional study was conducted between August and September 2020. An online survey link was shared in different online platforms, including Facebook, Twitter and LinkedIn inviting online users to participate in this study.

## Study population

Study participants included patients, university students and healthcare professionals residing in Malaysia. To be eligible, participants had to be 18 years or above and were literate enough to respond to an online questionnaire in English. The participants who took <1 minute to complete the questionnaire, were excluded during analyses.

## Sampling

Sample size was calculated using OpenEpi [21]. Considering 32.6 million population of Malaysia [22], 30% estimated prevalence of stress amongst Malaysians [23, 24], at 95% confidence intervals and 80% power, the estimated minimum sample size was 323. Snowball sampling technique was used to recruit the study participants. Once any participant filled up the online questionnaire, h/she forwarded the survey link to own personal/professional networks.

## Data collection

Google form was used to develop the study questionnaire. The first page included participant information statement and the consent form. Participants, who provided consents, could move to the next screen. There were two screening questions to determine eligibility of the study participants, one was age and the other was location of residence. Eligible participants accessed the full study questionnaire and responses were collected anonymously. The online survey link was shared through university/hospital staff/students' emails, text messages, WhatsApp and other social media platforms such as Facebook, Twitter and LinkedIn. Patients visiting any healthcare settings or university students within the defined study period were informed about the study and of the online link by the respective healthcare professionals or university faculty members.

## Study tool

We used the same survey questionnaire (except residence location/region in Malaysia) which was used earlier by the Australian investigators included in this study [7]. Three validated tools were included in the survey questionnaire. The Kessler Psychological Distress Scale (K10) tool having ten items was used to assess psychological distress [25], the Fear of COVID-19 scale (FCV-19S) having seven items was used to assess the levels of fear [26], and the Brief Resilient Coping Scale (BRCS) having four items was used to assess the levels of coping [27]. Each of those tools collected responses using a 5-point likert scale and the scoring was categorised as discussed in earlier study [7]. Reliability of using these tools had also been examined in a recent study [28]. The questionnaire was pre-tested and no changes were made.

## Data analyses

Data from Google forms were downloaded and analysed using STATA v.12. Continuous variables were described using descriptive statistics such as mean standard deviations, and proportions. Scoring in the K10 scale was re-defined into low (score 10–15) and moderate to very high (score 16–50), the FCV-19S scale to low (score 7–21) and high (score 22–35) and BRCS scale categorised into low (score 4–13) and medium to high (score 14–20) resilient coping. We used univariate and multivariate logistic regression to investigate the associations. The multivariate models were adjusted for socio-demographic variables such as age, gender, living status, country of birth, education, and employment status.

## Ethics

Ethics approval was obtained from the Human Research Ethics Committee (HREC) at Universiti Sains Malaysia (USM/JEPeM/COVID19-40). Data were collected anonymously and could not be linked back to identify any participant. Contact details of Befrienders was included at the end of the online questionnaire, allowing participant/s to access necessary support in case of distress during filling questionnaire.

## Results

A total of 720 individuals participated in this study. Mean age ( $\pm$ SD) of the participants was 31.7 ( $\pm$ 11.5) years, and most of them (56.7%) were in the age group 18–29 years. More than two-thirds of the participants (67.1%) were females. A quarter of the study population (27.1%) was from Penang, and another quarter (22.9%) was from Perak in Malaysia. Almost all of them (90.8%) were born in Malaysia. A third of the study population (30%) identified themselves as frontline or essential service workers, and a third (31.9%) was identified as patients. Details of the characteristics of the study population are presented in [Table 1](#).

About two-thirds of the study participants (62.1%) experienced moderate to very high levels of psychological distress. Only a quarter (27.1%) reported high levels of fear of COVID-19 and two-thirds of the participants (65.1%) were identified as having medium to high resilient coping ([Tables 2–4](#)).

[Table 5](#) shows the univariate and multivariate analyses regarding factors associated with psychological distress. Moderate to very high levels of psychological distress was associated with impacted financial situation due to COVID-19 (AOR 2.16, 95% CIs 1.54–3.03,  $p < 0.001$ ), alcohol drinking in the last four weeks (AOR 3.43, 95% CIs 1.45–8.10,  $p < 0.01$ ), being a patient (AOR 2.02, 95% CIs 1.39–2.93,  $p < 0.001$ ), and having higher levels of fear of COVID-19 (AOR 2.55, 95% CIs 1.70–3.80,  $p < 0.001$ ). However, those in the older age groups i.e. 30–59 years (AOR 0.51, 95% CIs 0.27–0.95,  $p < 0.05$ ), those of  $\geq 60$  years old (AOR 0.07, 95% CIs 0.01–0.37,  $p < 0.01$ ) and those who had medium to highly resilient coping (AOR 0.54, 95% CIs 0.38–0.77,  $p < 0.01$ ) were less likely experience higher psychological distress ([Table 5](#)).

[Table 6](#) shows the univariate and multivariate analyses regarding factors associated with fear of COVID-19. Study participants who had been tested negative for COVID-19 but were self-isolating (AOR 3.12, 95% CIs 1.04–9.32,  $p < 0.05$ ) and those who had moderate to very high levels of psychological distress (AOR 2.56, 95% CIs 1.71–3.83,  $p < 0.001$ ) also had high levels of fear. Conversely, study participants who were born in Malaysia (AOR 0.39, 95% CIs 0.18–0.86,  $p < 0.05$ ) and who drank alcohol in the last four weeks (AOR 0.26, 95% CIs 0.10–0.68,  $p < 0.01$ ) had lower levels of fear in this study ([Table 6](#)).

Study participants who provided care to a family member/patient with known/suspected case of COVID-19 had medium to high resilient coping (AOR 1.87, 95% CIs 1.01–3.46,  $p < 0.05$ ), whereas participants with moderate to very high levels of psychological distress had low resilient coping (AOR 0.54, 95% CIs 0.38–0.76,  $p < 0.01$ ) ([Table 7](#)).

## Discussion

This cross-sectional survey found that a large proportion of Malaysian residents experienced moderate to very high levels of psychological distress as a result of the COVID-19 pandemic. Malaysians, whose financial situation was impacted by COVID-19, those who drank alcohol in the past four weeks, those who self-identified as patients and those with higher levels of fear, were more likely to experience higher psychological distress. Higher levels of psychological distress were also associated with higher levels of fear and so were people who self-identified as patients. A large majority of the participants also reported as having medium to highly resilient

**Table 1. Characteristics of the study population.**

| Characteristics                                                               | Total, n(%) |
|-------------------------------------------------------------------------------|-------------|
| Total study participants                                                      | 720         |
| <b>Age (in years)</b>                                                         | <b>702</b>  |
| Mean ( $\pm$ SD)                                                              | 31.7 (11.5) |
| Range                                                                         | 19 to 76    |
| <b>Age groups</b>                                                             | <b>702</b>  |
| 18–29 years                                                                   | 398 (56.7)  |
| 30–59 years                                                                   | 282 (40.2)  |
| $\geq$ 60 years                                                               | 22 (3.1)    |
| <b>Gender</b>                                                                 | <b>720</b>  |
| Male                                                                          | 235 (32.6)  |
| Female                                                                        | 483 (67.1)  |
| Others                                                                        | 2 (0.3)     |
| <b>Location in Malaysia</b>                                                   | <b>720</b>  |
| Johor                                                                         | 24 (3.3)    |
| Kedah                                                                         | 50 (6.9)    |
| Kelantan                                                                      | 60 (8.3)    |
| Kuala Lumpur                                                                  | 72 (10.0)   |
| Kuala Terengganu                                                              | 5 (0.7)     |
| Malacca                                                                       | 7 (1.0)     |
| Nigari Sembilan                                                               | 8 (1.1)     |
| Pahang                                                                        | 16 (2.2)    |
| Penang                                                                        | 195 (27.1)  |
| Perak                                                                         | 165 (22.9)  |
| Perlis                                                                        | 3 (0.4)     |
| Sabah                                                                         | 13 (1.8)    |
| Sarawak                                                                       | 6 (0.8)     |
| Selangor                                                                      | 96 (13.3)   |
| <b>Living status</b>                                                          | <b>718</b>  |
| Live without family members (on your own/shared house/others)                 | 136 (18.9)  |
| Live with family members (partner and/or children)                            | 559 (77.9)  |
| <b>Born in Malaysia</b>                                                       | <b>720</b>  |
| No                                                                            | 66 (9.2)    |
| Yes                                                                           | 654 (90.8)  |
| <b>Completed level of education</b>                                           | <b>716</b>  |
| Secondary                                                                     | 113 (15.8)  |
| Diploma                                                                       | 119 (16.6)  |
| Degree (Bachelor)                                                             | 301 (42.0)  |
| Masters and above                                                             | 183 (25.6)  |
| <b>Current employment condition</b>                                           | <b>710</b>  |
| Unemployed/Home duties (No source of income)                                  | 309 (43.5)  |
| Jobs affected by COVID-19 (lost job/working hours reduced/afraid of job loss) | 46 (6.5)    |
| Have an income source (employed/Government benefits)                          | 355 (50.0)  |
| <b>Perceived distress due to change of employment status</b>                  | <b>699</b>  |
| A little to none                                                              | 482 (69.0)  |
| Moderate to a great deal                                                      | 217 (31.0)  |
| <b>Self-identification as a frontline or essential service worker</b>         | <b>720</b>  |
| No                                                                            | 504 (70.0)  |

*(Continued)*

Table 1. (Continued)

| Characteristics                                                                             | Total, n(%) |
|---------------------------------------------------------------------------------------------|-------------|
| Yes                                                                                         | 216 (30.0)  |
| <b>COVID-19 impacted financial situation</b>                                                | <b>720</b>  |
| No                                                                                          | 379 (52.6)  |
| Yes                                                                                         | 341 (47.4)  |
| <b>Co-morbidities</b>                                                                       | <b>612</b>  |
| No                                                                                          | 478 (78.1)  |
| Psychiatric/Mental health problem                                                           | 20 (3.3)    |
| Other co-morbidities*                                                                       | 114 (18.6)  |
| <b>Smoking</b>                                                                              | <b>720</b>  |
| Never smoker                                                                                | 656 (91.1)  |
| Ever smoker (Daily/Non-daily/Ex)                                                            | 64 (8.9)    |
| <b>Current alcohol drinking (last 4 weeks)</b>                                              | <b>713</b>  |
| No                                                                                          | 665 (93.3)  |
| Yes                                                                                         | 48 (6.7)    |
| <b>Increased alcohol drinking over the last 4 weeks</b>                                     | <b>48</b>   |
| No                                                                                          | 34 (70.8)   |
| Yes                                                                                         | 14 (29.2)   |
| <b>Provided care to a family member/patient with known/suspected case of COVID-19</b>       | <b>715</b>  |
| No                                                                                          | 647 (90.5)  |
| Yes                                                                                         | 68 (9.5)    |
| <b>Experience related to COVID-19 pandemic (multiple responses possible)</b>                | <b>688</b>  |
| No known exposure to COVID-19                                                               | 638 (92.7)  |
| I had recent overseas travel history and was in self-quarantine                             | 10 (1.5)    |
| I have been tested negative for COVID-19 but self-isolating                                 | 40 (5.8)    |
| <b>Self-identification as a patient (visited a healthcare provider in the last 4 weeks)</b> | <b>715</b>  |
| No                                                                                          | 487 (68.1)  |
| Yes                                                                                         | 228 (31.9)  |
| <b>Healthcare service use in the last 4 weeks</b>                                           | <b>301</b>  |
| Telehealth consultation/Use of national helpline                                            | 240 (79.7)  |
| In-person visit to a healthcare provider                                                    | 45 (15.0)   |
| Used both services                                                                          | 16 (5.3)    |
| <b>Healthcare service use to overcome COVID-19 related stress in the last 4 weeks</b>       | <b>707</b>  |
| No                                                                                          | 689 (97.5)  |
| Yes                                                                                         | 18 (2.5)    |

\* Stroke/Hypertension/Hyperlipidaemia/Diabetes/Cancer/Chronic respiratory illness

<https://doi.org/10.1371/journal.pone.0257304.t001>

coping during this pandemic especially those who provided care to family members affected by the pandemic.

Findings of our survey in Malaysia are comparable to similar studies conducted in other parts of the globe. Financial difficulty is associated with anxiety as well as a predisposition to depression after several months of quarantine exacerbated by undue uncertainty [29]. Studies among the general population in China and India have shown that poor economic status and difficulties in meeting living expenses during the COVID-19 pandemic significantly increasing the degree of psychological distress [30, 31]. Likewise, studies during the SARS and MERS epidemics have also shown that increased psychological distress was associated with increased financial difficulties. This could be explained by the emergence of a sense of uncertainty and

Table 2. Level of psychological distress among the study participants.

| Anxiety and Depression Checklist (K10) (last 4 weeks)                            | Total, n(%) |
|----------------------------------------------------------------------------------|-------------|
| <b>About how often did you feel tired out for no good reason?</b>                | <b>720</b>  |
| None                                                                             | 184 (25.6)  |
| A little                                                                         | 182 (25.3)  |
| Sometime                                                                         | 248 (34.4)  |
| Most of the time                                                                 | 83 (11.5)   |
| All the time                                                                     | 23 (3.2)    |
| <b>About how often did you feel nervous?</b>                                     | <b>720</b>  |
| None                                                                             | 229 (31.8)  |
| A little                                                                         | 221 (30.7)  |
| Sometime                                                                         | 206 (28.6)  |
| Most of the time                                                                 | 55 (7.6)    |
| All the time                                                                     | 9 (1.3)     |
| <b>About how often did you feel so nervous that nothing could calm you down?</b> | <b>720</b>  |
| None                                                                             | 378 (52.5)  |
| A little                                                                         | 178 (24.7)  |
| Sometime                                                                         | 129 (17.9)  |
| Most of the time                                                                 | 31 (4.3)    |
| All the time                                                                     | 4 (0.6)     |
| <b>About how often did you feel hopeless?</b>                                    | <b>720</b>  |
| None                                                                             | 361 (50.1)  |
| A little                                                                         | 176 (24.4)  |
| Sometime                                                                         | 120 (16.7)  |
| Most of the time                                                                 | 51 (7.1)    |
| All the time                                                                     | 12 (1.7)    |
| <b>About how often did you feel restless or fidgety?</b>                         | <b>720</b>  |
| None                                                                             | 296 (41.1)  |
| A little                                                                         | 200 (27.8)  |
| Sometime                                                                         | 164 (22.8)  |
| Most of the time                                                                 | 46 (6.4)    |
| All the time                                                                     | 14 (1.9)    |
| <b>About how often did you feel so restless you could not sit still?</b>         | <b>720</b>  |
| None                                                                             | 382 (53.1)  |
| A little                                                                         | 175 (24.3)  |
| Sometime                                                                         | 134 (18.6)  |
| Most of the time                                                                 | 22 (3.1)    |
| All the time                                                                     | 7 (1.0)     |
| <b>About how often did you feel so depressed?</b>                                | <b>720</b>  |
| None                                                                             | 310 (43.1)  |
| A little                                                                         | 205 (28.5)  |
| Sometime                                                                         | 139 (19.3)  |
| Most of the time                                                                 | 48 (6.7)    |
| All the time                                                                     | 18 (2.5)    |
| <b>About how often did you feel that everything was an effort?</b>               | <b>720</b>  |
| None                                                                             | 194 (26.9)  |
| A little                                                                         | 224 (31.1)  |
| Sometime                                                                         | 178 (24.7)  |
| Most of the time                                                                 | 98 (13.6)   |

(Continued)



Table 2. (Continued)

| Anxiety and Depression Checklist (K10) (last 4 weeks)                       | Total, n(%) |
|-----------------------------------------------------------------------------|-------------|
| All the time                                                                | 26 (3.6)    |
| <b>About how often did you feel so sad that nothing could cheer you up?</b> | <b>720</b>  |
| None                                                                        | 325 (45.1)  |
| A little                                                                    | 194 (26.9)  |
| Sometime                                                                    | 144 (20.0)  |
| Most of the time                                                            | 42 (5.8)    |
| All the time                                                                | 15 (2.1)    |
| <b>About how often did you feel worthless?</b>                              | <b>720</b>  |
| None                                                                        | 378 (52.5)  |
| A little                                                                    | 178 (24.7)  |
| Sometime                                                                    | 107 (14.9)  |
| Most of the time                                                            | 34 (4.7)    |
| All the time                                                                | 23 (3.2)    |
| <b>K10 score (total)</b>                                                    | <b>720</b>  |
| Mean ( $\pm$ SD)                                                            | 20.0 (8.3)  |
| Range                                                                       | 10 to 50    |
| <b>Level of psychological distress (K10 categories)</b>                     | <b>720</b>  |
| Low (score 10–15)                                                           | 273 (37.9)  |
| Moderate (score 16–21)                                                      | 177 (24.6)  |
| High (score 22–29)                                                          | 151 (21.0)  |
| Very high (score 30–50)                                                     | 119 (16.5)  |

<https://doi.org/10.1371/journal.pone.0257304.t002>

lack of security during the pandemic [32]. Hence, our finding further supports the inverse association between increased financial difficulties during COVID-19 and the occurrence of psychological distress.

In line with our findings, Ahmed et al. conducted a study in a Chinese population where they had also reported high prevalence of alcohol use and alcohol dependence during the COVID-19 pandemic [33]. Given that this was a cross-sectional study, it was possible that psychological distress led to increased alcohol use as a coping mechanism to deal with COVID-19 induced psychological distress, but the converse was also likely that increased alcohol use worsened psychological distress [34].

This study also showed that people who self-identified as a patient i.e. having visited a healthcare provider in the past four weeks, were more likely to experience higher psychological distress. However, it was not clear from the survey questionnaire if patients had visited a healthcare provider for COVID-19 like symptoms or for other medical conditions. Being infected with COVID-19 or awaiting the possibility of becoming ill was likely to be more stressful because of the fear of mortality or morbidity associated with a disease [29]. Those infected with COVID-19 had higher levels of depression, anxiety, and post-traumatic stress symptoms when compared to those not infected. In fact, people with a history of being infected with COVID-19 had reported unresolved fear, guilt, and helplessness. They were likely to be affected by the stigma of being labelled as someone who had been infected and faced uncertainty about their prognosis and future [35]. Moreover, the findings of this study also highlighted that those who tested negative for COVID-19 but maintained self-isolation from others had higher levels of fear, and those with higher levels of fear of COVID-19 also had moderate to high psychological distress. Knowing the high infectivity capability of the virus, the asymptomatic presentation of some of the COVID-19 positive cases, and the consequences

**Table 3. Level of fear of COVID-19 among the study participants.**

| Fear of COVID-19 Scale (FCV-19S) individual items                                                 | Total, n(%) |
|---------------------------------------------------------------------------------------------------|-------------|
| <b>I am most afraid of COVID-19</b>                                                               | <b>720</b>  |
| Strongly disagree                                                                                 | 106 (14.7)  |
| Somewhat disagree                                                                                 | 109 (15.1)  |
| Neither agree nor disagree                                                                        | 150 (20.8)  |
| Somewhat agree                                                                                    | 237 (32.9)  |
| Strongly agree                                                                                    | 118 (16.4)  |
| <b>It makes me uncomfortable to think about COVID-19</b>                                          | <b>720</b>  |
| Strongly disagree                                                                                 | 136 (18.9)  |
| Somewhat disagree                                                                                 | 118 (16.4)  |
| Neither agree nor disagree                                                                        | 165 (22.9)  |
| Somewhat agree                                                                                    | 230 (31.9)  |
| Strongly agree                                                                                    | 71 (9.9)    |
| <b>My hands become clammy when I think about COVID-19</b>                                         | <b>720</b>  |
| Strongly disagree                                                                                 | 333 (46.3)  |
| Somewhat disagree                                                                                 | 166 (23.1)  |
| Neither agree nor disagree                                                                        | 164 (22.8)  |
| Somewhat agree                                                                                    | 42 (5.8)    |
| Strongly agree                                                                                    | 15 (2.1)    |
| <b>I am afraid of losing my life because of COVID-19</b>                                          | <b>720</b>  |
| Strongly disagree                                                                                 | 188 (26.1)  |
| Somewhat disagree                                                                                 | 113 (15.7)  |
| Neither agree nor disagree                                                                        | 154 (21.4)  |
| Somewhat agree                                                                                    | 180 (25.0)  |
| Strongly agree                                                                                    | 85 (11.8)   |
| <b>When watching news and stories about COVID-19 on social media, I become nervous or anxious</b> | <b>720</b>  |
| Strongly disagree                                                                                 | 165 (22.9)  |
| Somewhat disagree                                                                                 | 139 (19.3)  |
| Neither agree nor disagree                                                                        | 161 (22.4)  |
| Somewhat agree                                                                                    | 216 (30.0)  |
| Strongly agree                                                                                    | 39 (5.4)    |
| <b>I cannot sleep because I'm worrying about getting COVID-19</b>                                 | <b>720</b>  |
| Strongly disagree                                                                                 | 413 (57.4)  |
| Somewhat disagree                                                                                 | 135 (18.8)  |
| Neither agree nor disagree                                                                        | 129 (17.9)  |
| Somewhat agree                                                                                    | 33 (4.6)    |
| Strongly agree                                                                                    | 10 (1.4)    |
| <b>My heart races or palpitates when I think about getting COVID-19</b>                           | <b>720</b>  |
| Strongly disagree                                                                                 | 346 (48.1)  |
| Somewhat disagree                                                                                 | 123 (17.1)  |
| Neither agree nor disagree                                                                        | 142 (19.7)  |
| Somewhat agree                                                                                    | 90 (12.5)   |
| Strongly agree                                                                                    | 19 (2.6)    |
| <b>FCV-19S score (total)</b>                                                                      | <b>720</b>  |
| Mean ( $\pm$ SD)                                                                                  | 17.5 (6.3)  |
| Range                                                                                             | 7 to 35     |
| <b>Level of fear of COVID-19 (FCV-19S categories)</b>                                             | <b>720</b>  |
| Low (score 7–21)                                                                                  | 525 (72.9)  |
| High (score 22–35)                                                                                | 195 (27.1)  |

<https://doi.org/10.1371/journal.pone.0257304.t003>

**Table 4. Coping during COVID-19 pandemic among the study participants.**

| Brief Resilient Coping Scale (BRCS) individual items                               | Total, n(%) |
|------------------------------------------------------------------------------------|-------------|
| <b>I look for creative ways to alter difficult situations</b>                      | <b>720</b>  |
| Does not describe me at all                                                        | 24 (3.3)    |
| Does not describe me                                                               | 55 (7.6)    |
| Neutral                                                                            | 289 (40.1)  |
| Describes me                                                                       | 270 (37.5)  |
| Describes me very well                                                             | 82 (11.4)   |
| <b>Regardless of what happens to me, I believe I can control my reaction to it</b> | <b>720</b>  |
| Does not describe me at all                                                        | 7 (1.0)     |
| Does not describe me                                                               | 56 (7.8)    |
| Neutral                                                                            | 249 (34.6)  |
| Describes me                                                                       | 302 (41.9)  |
| Describes me very well                                                             | 106 (14.7)  |
| <b>I believe I can grow in positive ways by dealing with difficult situations</b>  | <b>720</b>  |
| Does not describe me at all                                                        | 10 (1.4)    |
| Does not describe me                                                               | 33 (4.6)    |
| Neutral                                                                            | 182 (25.3)  |
| Describes me                                                                       | 348 (48.3)  |
| Describes me very well                                                             | 147 (20.4)  |
| <b>I actively look for ways to replace the losses I encounter in life</b>          | <b>720</b>  |
| Does not describe me at all                                                        | 26 (3.6)    |
| Does not describe me                                                               | 40 (5.6)    |
| Neutral                                                                            | 281 (39.0)  |
| Describes me                                                                       | 304 (42.2)  |
| Describes me very well                                                             | 69 (9.6)    |
| <b>BRCS score (total)</b>                                                          | <b>720</b>  |
| Mean ( $\pm$ SD)                                                                   | 14.4 (2.7)  |
| Range                                                                              | 4 to 20     |
| <b>Level of coping (BRCS categories)</b>                                           | <b>720</b>  |
| Low resilient coping (score 4–13)                                                  | 251 (34.9)  |
| Medium resilient coping (score 14–16)                                              | 345 (47.9)  |
| High resilient coping (score 17–20)                                                | 124 (17.2)  |

<https://doi.org/10.1371/journal.pone.0257304.t004>

of the COVID-19 infection had created enormous fear among the general population and healthcare workers [36–38]. Unresolved fear which led to long-lasting stress might have predisposed individuals to psychological distress during the COVID-19 pandemic [39]. Hence, our study further strengthened the relationship between fear of the COVID-19 pandemic and increased psychological distress.

Factors identified as protective factors against psychological distress in this study was older age ( $\geq 30$  years) and having higher level of resilience. Several studies on the psychological impact of COVID-19 in the general population reported that younger people (aged 21 to 40 years) were at higher risk of predisposing to depression and anxiety [40] highlighting consistency with other studies. Younger people may have greater focus on COVID-19 and higher degree of worry about the spread of COVID-19 presumably because of more and/or frequent access to news/social media, hence increasing their risk of psychological distress compared to older people [40].

Those with higher resilience, particularly in the components of tenacity, strength, and optimism, have shown to experience less mental health complications during the COVID-19

Table 5. Factors associated with high psychological distress among the study population (based on K10 scoring).

| Characteristics                                                               | Moderate to Very High (score 16–50), n(%) | Low (score 10–15), n(%) | Unadjusted analyses |      |           | Adjusted analyses |      |           |
|-------------------------------------------------------------------------------|-------------------------------------------|-------------------------|---------------------|------|-----------|-------------------|------|-----------|
|                                                                               |                                           |                         | p                   | OR   | 95% CIs   | p                 | AOR  | 95% CIs   |
| Total study participants                                                      | 447                                       | 273                     |                     |      |           |                   |      |           |
| <b>Age groups</b>                                                             | <b>433</b>                                | <b>269</b>              |                     |      |           |                   |      |           |
| 18–29 years                                                                   | 278 (64.2)                                | 120 (44.6)              |                     | 1    |           |                   | 1    |           |
| 30–59 years                                                                   | 153 (35.3)                                | 129 (48.0)              | <0.001              | 0.51 | 0.37–0.70 | 0.035             | 0.51 | 0.27–0.95 |
| ≥60years                                                                      | 2 (0.5)                                   | 20 (7.4)                | <0.001              | 0.04 | 0.01–0.19 | 0.002             | 0.07 | 0.01–0.37 |
| <b>Gender</b>                                                                 | <b>445</b>                                | <b>273</b>              |                     |      |           |                   |      |           |
| Male                                                                          | 126 (28.3)                                | 109 (39.9)              |                     | 1    |           |                   | 1    |           |
| Female                                                                        | 319 (71.17)                               | 164 (60.1)              | 0.001               | 1.68 | 1.22–2.31 | 0.186             | 1.57 | 0.80–3.07 |
| <b>Living status</b>                                                          | <b>426</b>                                | <b>269</b>              |                     |      |           |                   |      |           |
| Live without family members (on your own/shared house/ others)                | 90 (21.1)                                 | 46 (17.1)               |                     | 1    |           |                   | 1    |           |
| Live with family members (partner and/or children)                            | 336 (78.9)                                | 223 (82.9)              | 0.193               | 0.77 | 0.52–1.14 | 0.729             | 0.80 | 0.23–2.79 |
| <b>Born in Malaysia</b>                                                       | <b>447</b>                                | <b>273</b>              |                     |      |           |                   |      |           |
| No                                                                            | 53 (11.9)                                 | 13 (4.8)                |                     | 1    |           |                   | 1    |           |
| Yes                                                                           | 394 (88.1)                                | 260 (95.2)              | 0.001               | 0.37 | 0.20–0.70 | 0.257             | 0.60 | 0.24–1.46 |
| <b>Completed level of education</b>                                           | <b>444</b>                                | <b>272</b>              |                     |      |           |                   |      |           |
| Secondary                                                                     | 76 (17.1)                                 | 37 (13.6)               |                     | 1    |           |                   | 1    |           |
| Diploma                                                                       | 76 (17.1)                                 | 43 (15.8)               | 0.587               | 0.86 | 0.50–1.48 | 0.744             | 0.78 | 0.17–3.54 |
| Degree (Bachelor)                                                             | 209 (47.1)                                | 92 (33.8)               | 0.670               | 1.11 | 0.70–1.76 | 0.466             | 0.52 | 0.09–2.99 |
| Masters and above                                                             | 83 (18.7)                                 | 100 (36.8)              | <0.001              | 0.40 | 0.25–0.66 | 0.466             | 0.66 | 0.22–2.01 |
| <b>Current employment condition</b>                                           | <b>441</b>                                | <b>269</b>              |                     |      |           |                   |      |           |
| Unemployed/Home duties                                                        | 167 (37.9)                                | 142 (52.8)              |                     | 1    |           |                   | 1    |           |
| Jobs affected by COVID-19 (lost job/working hours reduced/afraid of job loss) | 29 (6.6)                                  | 17 (6.3)                | 0.254               | 1.45 | 0.77–2.75 | 0.698             | 1.24 | 0.42–3.69 |
| Have an income source (employed/Government benefits)                          | 245 (55.6)                                | 110 (40.9)              | <0.001              | 1.89 | 1.38–2.60 | 0.887             | 1.08 | 0.36–3.27 |
| <b>Perceived distress due to change of employment status</b>                  | <b>434</b>                                | <b>265</b>              |                     |      |           |                   |      |           |
| A little to none                                                              | 319 (73.5)                                | 163 (61.5)              |                     | 1    |           |                   | 1    |           |
| Moderate to a great deal                                                      | 115 (26.5)                                | 102 (38.5)              | 0.001               | 0.58 | 0.42–0.80 | 0.981             | NA   | NA        |
| <b>Self-identification as a frontline or essential service worker</b>         | <b>447</b>                                | <b>273</b>              |                     |      |           |                   |      |           |
| No                                                                            | 289 (64.7)                                | 215 (78.8)              |                     | 1    |           |                   | 1    |           |
| Yes                                                                           | 158 (35.3)                                | 58 (21.2)               | <0.001              | 2.03 | 1.43–2.87 | 0.071             | 1.59 | 0.96–2.63 |
| <b>COVID-19 impacted financial situation</b>                                  | <b>447</b>                                | <b>273</b>              |                     |      |           |                   |      |           |
| No                                                                            | 200 (44.7)                                | 179 (65.6)              |                     | 1    |           |                   | 1    |           |
| Yes                                                                           | 247 (55.3)                                | 94 (34.4)               | <0.001              | 2.35 | 1.72–3.21 | 0.000             | 2.16 | 1.54–3.03 |
| <b>Co-morbidities</b>                                                         | <b>372</b>                                | <b>240</b>              |                     |      |           |                   |      |           |
| No                                                                            | 274 (73.7)                                | 204 (85.0)              |                     | 1    |           |                   | 1    |           |

(Continued)

Table 5. (Continued)

| Characteristics                                                                             | Moderate to Very High (score 16–50), n(%) | Low (score 10–15), n(%) | Unadjusted analyses |      |           | Adjusted analyses |      |           |
|---------------------------------------------------------------------------------------------|-------------------------------------------|-------------------------|---------------------|------|-----------|-------------------|------|-----------|
|                                                                                             |                                           |                         | p                   | OR   | 95% CIs   | p                 | AOR  | 95% CIs   |
| Psychiatric/Mental health problem                                                           | 10 (2.7)                                  | 10 (4.2)                | 0.518               | 0.74 | 0.30–1.82 | 0.254             | 0.24 | 0.02–2.79 |
| Other co-morbidities*                                                                       | 88 (23.7)                                 | 26 (10.8)               | <0.001              | 2.52 | 1.57–4.05 | 0.285             | 1.47 | 0.73–2.97 |
| <b>Smoking</b>                                                                              | <b>447</b>                                | <b>273</b>              |                     |      |           |                   |      |           |
| Never smoker                                                                                | 405 (90.6)                                | 251 (91.9)              |                     | 1    |           |                   | 1    |           |
| Ever smoker (Daily/Non-daily/Ex)                                                            | 42 (9.4)                                  | 22 (8.1)                | 0.541               | 1.18 | 0.69–2.03 | 0.734             | 0.83 | 0.28–2.47 |
| <b>Current alcohol drinking (last 4 weeks)</b>                                              | <b>443</b>                                | <b>270</b>              |                     |      |           |                   |      |           |
| No                                                                                          | 403 (91.0)                                | 262 (97.0)              |                     | 1    |           |                   | 1    |           |
| Yes                                                                                         | 40 (9.0)                                  | 8 (3.0)                 | 0.002               | 3.25 | 1.50–7.06 | 0.005             | 3.43 | 1.45–8.10 |
| <b>Provided care to a family member/patient with known/suspected case of COVID-19</b>       | <b>443</b>                                | <b>272</b>              |                     |      |           |                   |      |           |
| No                                                                                          | 394 (88.9)                                | 253 (93.0)              |                     | 1    |           |                   | 1    |           |
| Yes                                                                                         | 49 (11.1)                                 | 19 (7.0)                | 0.071               | 1.66 | 0.95–2.88 | 0.120             | 1.60 | 0.89–2.89 |
| <b>Experience related to COVID-19 pandemic</b>                                              | <b>423</b>                                | <b>265</b>              |                     |      |           |                   |      |           |
| No known exposure to COVID-19                                                               | 385 (91.0)                                | 253 (95.5)              |                     | 1    |           |                   | 1    |           |
| I had recent overseas travel history and was in self-quarantine                             | 7 (1.7)                                   | 3 (1.1)                 | 0.538               | 1.53 | 0.39–5.98 | NA                | NA   | NA        |
| I have been tested negative for COVID-19 but self-isolating                                 | 31 (7.3)                                  | 9 (3.4)                 | 0.035               | 2.26 | 1.06–4.83 | 0.592             | 0.74 | 0.25–2.23 |
| <b>Self-identification as a patient (visited a healthcare provider in the last 4 weeks)</b> | <b>444</b>                                | <b>271</b>              |                     |      |           |                   |      |           |
| No                                                                                          | 280 (63.1)                                | 207 (76.4)              |                     | 1    |           |                   | 1    |           |
| Yes                                                                                         | 164 (36.9)                                | 64 (23.6)               | <0.001              | 1.89 | 1.35–2.66 | 0.000             | 2.02 | 1.39–2.93 |
| <b>Healthcare service use in the last 4 weeks</b>                                           | <b>207</b>                                | <b>94</b>               |                     |      |           |                   |      |           |
| Telehealth consultation/Use of national helpline                                            | 34 (16.4)                                 | 11 (11.7)               |                     | 1    |           |                   | 1    |           |
| In-person visit to a healthcare provider                                                    | 160 (77.3)                                | 80 (85.1)               | 0.243               | 0.65 | 0.31–1.34 | 0.473             | 0.76 | 0.35–1.62 |
| Used both services                                                                          | 13 (6.3)                                  | 3 (3.2)                 | 0.643               | 1.40 | 0.34–5.84 | 0.551             | 1.57 | 0.36–6.84 |
| <b>Level of fear of COVID-19 (FCV-19S categories)</b>                                       | <b>447</b>                                | <b>273</b>              |                     |      |           |                   |      |           |
| Low (score 7–21)                                                                            | 301 (67.3)                                | 224 (82.1)              |                     | 1    |           |                   | 1    |           |
| High (score 22–35)                                                                          | 146 (32.7)                                | 49 (17.9)               | <0.001              | 2.22 | 1.54–3.20 | 0.000             | 2.55 | 1.70–3.80 |
| <b>Level of coping (BRCS categories)</b>                                                    | <b>447</b>                                | <b>273</b>              |                     |      |           |                   |      |           |
| Low resilient coping (score 4–13)                                                           | 176 (39.4)                                | 75 (27.5)               |                     | 1    |           |                   | 1    |           |
| Medium to high resilient coping (score 14–20)                                               | 271 (60.6)                                | 198 (72.5)              | 0.001               | 0.58 | 0.42–0.81 | 0.001             | 0.54 | 0.38–0.77 |
| <b>Healthcare service use to overcome COVID-19 related stress in the last 4 weeks</b>       | <b>440</b>                                | <b>267</b>              |                     |      |           |                   |      |           |
| No                                                                                          | 426 (96.8)                                | 263 (98.5)              |                     | 1    |           |                   | 1    |           |
| Yes                                                                                         | 14 (3.2)                                  | 4 (1.5)                 | 0.168               | 2.16 | 0.70–6.63 | 0.196             | 2.13 | 0.68–6.69 |

Adjusted for: age, gender, living status, born in Malaysia, education and employment

\* Cardiac diseases/Stroke/Hypertension/Hyperlipidemia/Diabetes/Cancer/Chronic respiratory disease

<https://doi.org/10.1371/journal.pone.0257304.t005>

**Table 6. Factors associated with high levels of fear of COVID-19 among the study population (based on FCV-19S scoring).**

| Characteristics                                                               | High (score 22–35),<br>n(%) | Low (score 7–21),<br>n(%) | Unadjusted analyses |             |                  | Adjusted analyses |             |                  |
|-------------------------------------------------------------------------------|-----------------------------|---------------------------|---------------------|-------------|------------------|-------------------|-------------|------------------|
|                                                                               |                             |                           | p                   | OR          | 95% CIs          | p                 | AOR         | 95% CIs          |
| Total study participants                                                      | 195                         | 525                       |                     |             |                  |                   |             |                  |
| <b>Age groups</b>                                                             | <b>191</b>                  | <b>511</b>                |                     |             |                  |                   |             |                  |
| 18–29 years                                                                   | 105 (55.0)                  | 293 (57.3)                |                     | 1           |                  |                   | 1           |                  |
| 30–59 years                                                                   | 81 (42.4)                   | 201 (39.3)                | 0.500               | 1.12        | 0.80–1.58        | 0.493             | 1.25        | 0.66–2.39        |
| ≥60 years                                                                     | 5 (2.6)                     | 17 (3.3)                  | 0.705               | 0.82        | 0.30–2.28        | 0.599             | 0.70        | 0.18–2.67        |
| <b>Gender</b>                                                                 | <b>195</b>                  | <b>523</b>                |                     |             |                  |                   |             |                  |
| Male                                                                          | 65 (33.3)                   | 170 (32.5)                |                     | 1           |                  |                   | 1           |                  |
| Female                                                                        | 130 (66.7)                  | 353 (67.5)                | 0.833               | 0.96        | 0.68–1.37        | 0.795             | 1.10        | 0.54–2.26        |
| <b>Living status</b>                                                          | <b>187</b>                  | <b>508</b>                |                     |             |                  |                   |             |                  |
| Live without family members (on your own/shared house/others)                 | 38 (20.3)                   | 98 (19.3)                 |                     | 1           |                  |                   | 1           |                  |
| Live with family members (partner and/or children)                            | 149 (79.7)                  | 410 (80.7)                | 0.762               | 0.94        | 0.62–1.43        | 0.276             | 2.53        | 0.48–13.5        |
| <b>Born in Malaysia</b>                                                       | <b>195</b>                  | <b>525</b>                |                     |             |                  |                   |             |                  |
| No                                                                            | 25 (12.8)                   | 41 (7.8)                  |                     | 1           |                  |                   | 1           |                  |
| Yes                                                                           | 170 (87.2)                  | 484 (92.2)                | <b>0.038</b>        | <b>0.58</b> | <b>0.34–0.98</b> | <b>0.020</b>      | <b>0.39</b> | <b>0.18–0.86</b> |
| <b>Completed level of education</b>                                           | <b>194</b>                  | <b>522</b>                |                     |             |                  |                   |             |                  |
| Secondary                                                                     | 35 (18.0)                   | 78 (14.9)                 |                     | 1           |                  |                   | 1           |                  |
| Diploma                                                                       | 29 (14.9)                   | 90 (17.2)                 | 0.262               | 0.72        | 0.40–1.28        | 0.239             | 0.32        | 0.05–2.14        |
| Degree (Bachelor)                                                             | 81 (41.8)                   | 220 (42.1)                | 0.413               | 0.82        | 0.51–1.32        | 0.251             | 0.29        | 0.04–2.38        |
| Masters and above                                                             | 49 (25.3)                   | 134 (25.7)                | 0.437               | 0.81        | 0.49–1.37        | 0.152             | 0.32        | 0.07–1.52        |
| <b>Current employment condition</b>                                           | <b>96</b>                   | <b>259</b>                |                     |             |                  |                   |             |                  |
| Unemployed/Home duties                                                        | 88 (45.8)                   | 221 (42.7)                |                     | 1           |                  |                   | 1           |                  |
| Jobs affected by COVID-19 (lost job/working hours reduced/afraid of job loss) | 8 (4.2)                     | 38 (7.3)                  | 0.119               | 0.53        | 0.24–1.18        | 0.212             | 0.46        | 0.13–1.56        |
| Have an income source (employed/Government benefits)                          | 96 (50.0)                   | 259 (50.0)                | 0.680               | 0.93        | 0.66–1.31        | 0.893             | 0.92        | 0.29–2.98        |
| <b>Perceived distress due to change of employment status</b>                  | <b>189</b>                  | <b>510</b>                |                     |             |                  |                   |             |                  |
| A little to none                                                              | 130 (68.8)                  | 352 (69.0)                |                     | 1           |                  |                   | 1           |                  |
| Moderate to a great deal                                                      | 59 (31.2)                   | 158 (31.0)                | 0.952               | 1.01        | 0.71–1.45        | NA                | NA          | NA               |
| <b>Self-identification as a frontline or essential service worker</b>         | <b>195</b>                  | <b>525</b>                |                     |             |                  |                   |             |                  |
| No                                                                            | 138 (70.8)                  | 366 (69.7)                |                     | 1           |                  |                   | 1           |                  |
| Yes                                                                           | 57 (29.2)                   | 159 (30.3)                | 0.784               | 0.95        | 0.66–1.36        | 0.112             | 0.64        | 0.37–1.11        |
| <b>COVID-19 impacted financial situation</b>                                  | <b>195</b>                  | <b>525</b>                |                     |             |                  |                   |             |                  |
| No                                                                            | 92 (47.2)                   | 287 (54.7)                |                     | 1           |                  |                   | 1           |                  |
| Yes                                                                           | 103 (52.8)                  | 238 (45.3)                | 0.074               | 1.35        | 0.97–1.88        | 0.119             | 1.33        | 0.93–1.89        |
| <b>Co-morbidities</b>                                                         | <b>161</b>                  | <b>451</b>                |                     |             |                  |                   |             |                  |
| No                                                                            | 123 (76.4)                  | 355 (78.7)                |                     | 1           |                  |                   | 1           |                  |
| Psychiatric/Mental health problem                                             | 3 (1.9)                     | 17 (3.8)                  | 0.288               | 0.51        | 0.15–1.77        | 0.648             | 0.50        | 0.03–9.77        |

(Continued)

Table 6. (Continued)

| Characteristics                                                                             | High (score 22–35),<br>n(%) | Low (score 7–21),<br>n(%) | Unadjusted analyses |             |                  | Adjusted analyses |             |                  |
|---------------------------------------------------------------------------------------------|-----------------------------|---------------------------|---------------------|-------------|------------------|-------------------|-------------|------------------|
|                                                                                             |                             |                           | p                   | OR          | 95% CIs          | p                 | AOR         | 95% CIs          |
| Other co-morbidities*                                                                       | 35 (21.7)                   | 79 (17.5)                 | 0.282               | 1.28        | 0.82–2.00        | 0.585             | 0.81        | 0.37–1.75        |
| <b>Smoking</b>                                                                              | <b>195</b>                  | <b>525</b>                |                     |             |                  |                   |             |                  |
| Never smoker                                                                                | 172 (88.2)                  | 484 (92.2)                |                     | 1           |                  |                   | 1           |                  |
| Ever smoker (Daily/Non-daily/Ex)                                                            | 23 (11.8)                   | 41 (7.8)                  | 0.095               | 1.58        | 0.92–2.71        | 0.413             | 1.61        | 0.52–4.99        |
| <b>Current alcohol drinking (last 4 weeks)</b>                                              | <b>193</b>                  | <b>520</b>                |                     |             |                  |                   |             |                  |
| No                                                                                          | 186 (96.4)                  | 479 (92.1)                |                     | 1           |                  |                   | 1           |                  |
| Yes                                                                                         | 7 (3.6)                     | 41 (7.9)                  | <b>0.044</b>        | <b>0.44</b> | <b>0.19–0.99</b> | <b>0.006</b>      | <b>0.26</b> | <b>0.10–0.68</b> |
| <b>Provided care to a family member/patient with known/suspected case of COVID-19</b>       | <b>194</b>                  | <b>521</b>                |                     |             |                  |                   |             |                  |
| No                                                                                          | 175 (90.2)                  | 472 (90.6)                |                     | 1           |                  |                   | 1           |                  |
| Yes                                                                                         | 19 (9.8)                    | 49 (9.4)                  | 0.875               | 1.05        | 0.60–1.83        | 0.60              | 1.17        | 0.65–2.11        |
| <b>Experience related to COVID-19 pandemic</b>                                              | <b>183</b>                  | <b>505</b>                |                     |             |                  |                   |             |                  |
| No known exposure to COVID-19                                                               | 164 (89.6)                  | 474 (93.9)                |                     | 1           |                  |                   | 1           |                  |
| I had recent overseas travel history and was in self-quarantine                             | 4 (2.2)                     | 6 (1.2)                   | 0.314               | 1.93        | 0.54–6.91        | NA                | NA          | NA               |
| I have been tested negative for COVID-19 but self-isolating                                 | 15 (8.2)                    | 25 (5.0)                  | 0.104               | 1.73        | 0.89–3.37        | <b>0.042</b>      | <b>3.12</b> | <b>1.04–9.32</b> |
| <b>Self-identification as a patient (visited a healthcare provider in the last 4 weeks)</b> | <b>194</b>                  | <b>521</b>                |                     |             |                  |                   |             |                  |
| No                                                                                          | 132 (68.0)                  | 355 (68.1)                |                     | 1           |                  |                   | 1           |                  |
| Yes                                                                                         | 62 (32.0)                   | 166 (31.9)                | 0.980               | 1.00        | 0.71–1.43        | 0.924             | 1.02        | 0.70–1.48        |
| <b>Healthcare service use in the last 4 weeks</b>                                           | <b>79</b>                   | <b>222</b>                |                     |             |                  |                   |             |                  |
| Telehealth consultation/Use of national helpline                                            | 12 (15.2)                   | 33 (14.9)                 |                     | 1           |                  |                   | 1           |                  |
| In-person visit to a healthcare provider                                                    | 61 (77.2)                   | 179 (80.6)                | 0.860               | 0.94        | 0.46–1.93        | 0.413             | 0.73        | 0.34–1.57        |
| Used both services                                                                          | 6 (7.6)                     | 10 (4.5)                  | 0.417               | 1.65        | 0.49–5.53        | 0.804             | 1.18        | 0.33–4.24        |
| <b>Level of psychological distress (K10 categories)</b>                                     | <b>195</b>                  | <b>525</b>                |                     |             |                  |                   |             |                  |
| Low (score 10–15)                                                                           | 49 (25.1)                   | 224 (42.7)                |                     | 1           |                  |                   | 1           |                  |
| Moderate to Very High (score 16–50)                                                         | 146 (74.9)                  | 301 (57.3)                | <b>&lt;0.001</b>    | <b>2.22</b> | <b>1.54–3.20</b> | <b>&lt;0.001</b>  | <b>2.56</b> | <b>1.71–3.83</b> |
| <b>Level of coping (BRCS categories)</b>                                                    | <b>195</b>                  | <b>525</b>                |                     |             |                  |                   |             |                  |
| Low resilient coping (score 4–13)                                                           | 77 (39.5)                   | 174 (33.1)                |                     | 1           |                  |                   | 1           |                  |
| Medium to high resilient coping (score 14–20)                                               | 118 (60.5)                  | 351 (66.9)                | 0.112               | 0.76        | 0.54–1.07        | 0.074             | 0.72        | 0.50–1.03        |
| <b>Healthcare service use to overcome COVID-19 related stress in the last 4 weeks</b>       | <b>191</b>                  | <b>516</b>                |                     |             |                  |                   |             |                  |
| No                                                                                          | 185 (96.9)                  | 504 (97.7)                |                     | 1           |                  |                   | 1           |                  |
| Yes                                                                                         | 6 (3.1)                     | 12 (2.3)                  | 0.541               | 1.36        | 0.50–3.68        | 0.453             | 1.47        | 0.54–4.02        |

Adjusted for: age, gender, living status, born in Malaysia, education and employment

\* Cardiac diseases/Stroke/Hypertension/Hyperlipidemia/Diabetes/Cancer/Chronic respiratory disease

<https://doi.org/10.1371/journal.pone.0257304.t006>

Table 7. Factors associated with coping among the study population (based on BRCS scoring).

| Characteristics                                                               | Medium to High (score 14–20), n(%) | Low (score 4–13), n(%) | Unadjusted analyses |             |                  | Adjusted analyses |      |           |
|-------------------------------------------------------------------------------|------------------------------------|------------------------|---------------------|-------------|------------------|-------------------|------|-----------|
|                                                                               |                                    |                        | p                   | OR          | 95% CIs          | p                 | AOR  | 95% CIs   |
| Total study participants                                                      | 469                                | 251                    |                     |             |                  |                   |      |           |
| <b>Age groups</b>                                                             | <b>459</b>                         | <b>243</b>             |                     |             |                  |                   |      |           |
| 18–29 years                                                                   | 250 (54.5)                         | 148 (60.9)             |                     | 1           |                  |                   | 1    |           |
| 30–59 years                                                                   | 195 (42.5)                         | 87 (35.8)              | 0.087               | 1.33        | 0.96–1.84        | 0.525             | 1.23 | 0.65–2.34 |
| ≥60 years                                                                     | 14 (3.1)                           | 8 (3.3)                | 0.938               | 1.04        | 0.42–2.53        | 0.831             | 0.88 | 0.27–2.84 |
| <b>Gender</b>                                                                 | <b>468</b>                         | <b>250</b>             |                     |             |                  |                   |      |           |
| Male                                                                          | 153 (32.7)                         | 82 (32.8)              |                     | 1           |                  |                   | 1    |           |
| Female                                                                        | 315 (67.3)                         | 168 (67.2)             | 0.977               | 1.01        | 0.73–1.39        | 0.455             | 0.76 | 0.38–1.55 |
| <b>Living status</b>                                                          | <b>454</b>                         | <b>241</b>             |                     |             |                  |                   |      |           |
| Live without family members (on your own/shared house/others)                 | 86 (18.9)                          | 50 (20.7)              |                     | 1           |                  |                   | 1    |           |
| Live with family members (partner and/or children)                            | 368 (81.1)                         | 191 (79.3)             | 0.568               | 1.12        | 0.76–1.65        | 0.125             | 2.64 | 0.77–9.10 |
| <b>Born in Malaysia</b>                                                       | <b>469</b>                         | <b>251</b>             |                     |             |                  |                   |      |           |
| No                                                                            | 48 (10.2)                          | 18 (7.2)               |                     | 1           |                  |                   | 1    |           |
| Yes                                                                           | 421 (89.8)                         | 233 (92.8)             | 0.175               | 0.68        | 0.39–1.19        | 0.032             | 0.33 | 0.12–0.91 |
| <b>Completed level of education</b>                                           | <b>466</b>                         | <b>250</b>             |                     |             |                  |                   |      |           |
| Secondary                                                                     | 77 (16.5)                          | 36 (14.4)              |                     | 1           |                  |                   | 1    |           |
| Diploma                                                                       | 83 (17.8)                          | 36 (14.4)              | 0.792               | 1.08        | 0.62–1.88        | 0.842             | 1.19 | 0.21–6.59 |
| Degree (Bachelor)                                                             | 192 (41.2)                         | 109 (43.6)             | 0.408               | 0.82        | 0.52–1.30        | 0.899             | 0.88 | 0.13–5.90 |
| Masters and above                                                             | 114 (24.5)                         | 69 (27.6)              | 0.308               | 0.77        | 0.47–1.27        | 0.083             | 0.39 | 0.13–1.13 |
| <b>Current employment condition</b>                                           | <b>460</b>                         | <b>250</b>             |                     |             |                  |                   |      |           |
| Unemployed/Home duties                                                        | 201 (43.7)                         | 108 (43.2)             |                     | 1           |                  |                   | 1    |           |
| Jobs affected by COVID-19 (lost job/working hours reduced/afraid of job loss) | 29 (6.3)                           | 29 (6.3)               | 0.791               | 0.92        | 0.48–1.74        | 0.103             | 0.32 | 0.08–1.26 |
| Have an income source (employed/Government benefits)                          | 230 (50.0)                         | 230 (50.0)             | 0.944               | 0.99        | 0.72–1.36        | 0.320             | 0.49 | 0.12–1.99 |
| <b>Perceived distress due to change of employment status</b>                  | <b>450</b>                         | <b>249</b>             |                     |             |                  |                   |      |           |
| A little to none                                                              | 315 (70.0)                         | 167 (67.1)             |                     | 1           |                  |                   | 1    |           |
| Moderate to a great deal                                                      | 135 (30.0)                         | 82 (32.9)              | 0.422               | 0.87        | 0.63–1.22        | NA                | NA   | NA        |
| <b>Self-identification as a frontline or essential service worker</b>         | <b>469</b>                         | <b>251</b>             |                     |             |                  |                   |      |           |
| No                                                                            | 327 (69.7)                         | 177 (70.5)             |                     | 1           |                  |                   | 1    |           |
| Yes                                                                           | 142 (30.3)                         | 74 (29.5)              | 0.824               | 1.04        | 0.74–1.45        | 0.655             | 0.89 | 0.55–1.46 |
| <b>COVID-19 impacted financial situation</b>                                  | <b>469</b>                         | <b>251</b>             |                     |             |                  |                   |      |           |
| No                                                                            | 262 (55.9)                         | 117 (46.6)             |                     | 1           |                  |                   | 1    |           |
| Yes                                                                           | 207 (44.1)                         | 134 (53.4)             | <b>0.018</b>        | <b>0.69</b> | <b>0.51–0.94</b> | 0.058             | 0.73 | 0.52–1.01 |
| <b>Co-morbidities</b>                                                         | <b>395</b>                         | <b>217</b>             |                     |             |                  |                   |      |           |
| No                                                                            | 304 (77.0)                         | 174 (80.2)             |                     | 1           |                  |                   | 1    |           |
| Psychiatric/Mental health problem                                             | 11 (2.8)                           | 9 (4.1)                | 0.437               | 0.70        | 0.28–1.72        | 0.629             | 1.67 | 0.21–13.2 |

(Continued)



Table 7. (Continued)

| Characteristics                                                                             | Medium to High (score 14–20), n(%) | Low (score 4–13), n(%) | Unadjusted analyses |             |                  | Adjusted analyses |             |                  |
|---------------------------------------------------------------------------------------------|------------------------------------|------------------------|---------------------|-------------|------------------|-------------------|-------------|------------------|
|                                                                                             |                                    |                        | p                   | OR          | 95% CIs          | p                 | AOR         | 95% CIs          |
| Other co-morbidities*                                                                       | 80 (20.3)                          | 34 (15.7)              | 0.187               | 1.35        | 0.87–2.10        | 0.391             | 1.34        | 0.21–13.2        |
| <b>Smoking</b>                                                                              | <b>469</b>                         | <b>251</b>             |                     |             |                  |                   |             |                  |
| Never smoker                                                                                | 423 (90.2)                         | 233 (92.8)             |                     | 1           |                  |                   | 1           |                  |
| Ever smoker (Daily/Non-daily/Ex)                                                            | 46 (9.8)                           | 18 (7.2)               | 0.236               | 1.41        | 0.80–2.48        | 0.564             | 1.41        | 0.44–4.52        |
| <b>Current alcohol drinking (last 4 weeks)</b>                                              | <b>466</b>                         | <b>247</b>             |                     |             |                  |                   |             |                  |
| No                                                                                          | 434 (93.1)                         | 231 (93.5)             |                     | 1           |                  |                   | 1           |                  |
| Yes                                                                                         | 32 (6.9)                           | 16 (6.5)               | 0.844               | 1.07        | 0.57–1.98        | 0.813             | 1.08        | 0.56–2.09        |
| <b>Provided care to a family member/patient with known/suspected case of COVID-19</b>       | <b>465</b>                         | <b>250</b>             |                     |             |                  |                   |             |                  |
| No                                                                                          | 415 (89.2)                         | 232 (92.8)             |                     | 1           |                  |                   | 1           |                  |
| Yes                                                                                         | 50 (10.8)                          | 18 (7.2)               | 0.123               | 1.55        | 0.89–2.73        | <b>0.046</b>      | <b>1.87</b> | <b>1.01–3.46</b> |
| <b>Experience related to COVID-19 pandemic</b>                                              | <b>442</b>                         | <b>246</b>             |                     |             |                  |                   |             |                  |
| No known exposure to COVID-19                                                               | 407 (92.1)                         | 231 (92.1)             |                     | 1           |                  |                   | 1           |                  |
| I had recent overseas travel history and was in self-quarantine                             | 4 (0.9)                            | 6 (2.4)                | 0.135               | 0.38        | 0.11–1.35        | NA                | NA          | NA               |
| I have been tested negative for COVID-19 but self-isolating                                 | 31 (7.0)                           | 9 (3.7)                | 0.084               | 1.95        | 0.91–4.18        | 0.090             | 3.73        | 0.81–17.1        |
| <b>Self-identification as a patient (visited a healthcare provider in the last 4 weeks)</b> | <b>468</b>                         | <b>247</b>             |                     |             |                  |                   |             |                  |
| No                                                                                          | 324 (69.2)                         | 163 (66.0)             |                     | 1           |                  |                   | 1           |                  |
| Yes                                                                                         | 144 (30.8)                         | 84 (34.0)              | 0.377               | 0.86        | 0.62–1.20        | 0.283             | 0.83        | 0.58–1.17        |
| <b>Healthcare service use in the last 4 weeks</b>                                           | <b>184</b>                         | <b>177</b>             |                     |             |                  |                   |             |                  |
| Telehealth consultation/Use of national helpline                                            | 27 (14.7)                          | 18 (15.4)              |                     | 1           |                  |                   | 1           |                  |
| In-person visit to a healthcare provider                                                    | 144 (78.3)                         | 96 (82.1)              | 1.000               | 1.00        | 0.52–1.92        | 0.982             | 1.01        | 0.51–2.01        |
| Used both services                                                                          | 13 (7.1)                           | 3 (2.6)                | 0.135               | 2.89        | 0.72–11.6        | 0.133             | 3.02        | 0.71–12.8        |
| <b>Level of psychological distress (K10 categories)</b>                                     | <b>469</b>                         | <b>251</b>             |                     |             |                  |                   |             |                  |
| Low (score 10–15)                                                                           | 198 (42.2)                         | 75 (29.9)              |                     | 1           |                  |                   | 1           |                  |
| Moderate to Very High (score 16–50)                                                         | 271 (57.8)                         | 176 (70.1)             | <b>0.001</b>        | <b>0.58</b> | <b>0.42–0.81</b> | <b>0.001</b>      | <b>0.54</b> | <b>0.38–0.76</b> |
| <b>Level of fear of COVID-19 (FCV-19S categories)</b>                                       | <b>469</b>                         | <b>251</b>             |                     |             |                  |                   |             |                  |
| Low (score 7–21)                                                                            | 351 (74.8)                         | 174 (69.3)             |                     | 1           |                  |                   | 1           |                  |
| High (score 22–35)                                                                          | 118 (25.2)                         | 77 (30.7)              | 0.112               | 0.76        | 0.54–1.07        | 0.074             | 0.72        | 0.50–1.03        |
| <b>Healthcare service use to overcome COVID-19 related stress in the last 4 weeks</b>       | <b>465</b>                         | <b>242</b>             |                     |             |                  |                   |             |                  |
| No                                                                                          | 456 (98.1)                         | 233 (96.3)             |                     | 1           |                  |                   | 1           |                  |
| Yes                                                                                         | 9 (1.9)                            | 9 (3.7)                | 0.153               | 0.51        | 0.20–1.31        | 0.193             | 0.53        | 0.21–1.37        |

Adjusted for: age, gender, living status, born in Malaysia, education and employment

\* Cardiac diseases/Stroke/Hypertension/Hyperlipidemia/Diabetes/Cancer/Chronic respiratory disease

<https://doi.org/10.1371/journal.pone.0257304.t007>

pandemic [41]. Our study has also indicated that low resilience was associated with moderate to high levels of psychological distress while moderate to high resilience was not only associated with lower psychological distress, but also enabled the individual to provide care to family members or patients infected with COVID-19. Hence, our study highlighted the pivotal role of resilience in overcoming the psychological impact of the COVID-19 pandemic.

The strength of this study was the use of validated tools to investigate the factors associated with psychological distress, fear and coping strategies in Malaysia. Due to nation-wide travel restrictions, online survey was the only feasible way for data collection, and we were able to recruit a large sample of Malaysian population during the critical pandemic period. However, there were some limitations in this study. As this study was an online survey, most younger people participated into this survey as they were more active on social media. The study was conducted in English, so those who were not well versed in English might not be able to take part in the study. It was beyond the scope of the study to check and ensure that the participants had sufficient ability in understanding English. Due to the self-reporting nature of the survey, possibility of reporting bias cannot be excluded. The survey responses were predominantly from west Malaysia, although the survey link was shared across all the states in Malaysia through various social media platforms and emails. This could be explained by the researchers' use of snowball sampling techniques which reflected their community acquaintances and accessibility to clinics/allied health service facilities more in West Malaysia than in the eastern part of Malaysia. Another important limitation of our study was, those who might have tested positive to COVID-19 or those whose family members or friends were tested positive with COVID-19 infection or who were interested to this topic were more likely to participate into this survey. We also acknowledge that we might have missed the more marginalized or vulnerable group of population in this study (e.g., those who were more isolated specially people from rural areas, from the areas of poor internet access, older people those who were not active in social media, or migrant or other minority groups); therefore, the findings of this study could be potentially underestimated and might not be representative to the general Malaysian Population.

## Conclusions

The study identified some of the key risk factors for developing psychological distress, fear and coping strategies during the COVID-19 pandemic in Malaysia. Vulnerable groups of individuals such as patients and those impacted financially during COVID-19 should be supported for their mental wellbeing. Behavioural interventions should be targeted to reduce the impact of alcohol drinking during such crisis period. Findings of this study would assist the researchers to plan future studies with vulnerable groups of Malaysians, specifically exploring the strategies to support their mental wellbeing during the pandemic and post-pandemic period. Specific interventions based on the emerging evidence arising from Malaysian and global studies can be tested to alleviate psychological distress, fear and improve resilience among Malaysian population.

## Acknowledgments

We would like to acknowledge the support from Trisha Zafrin, Nur Syakirarah Binti Mohamed Elias for helping us for data collection.

## Author Contributions

**Conceptualization:** Wendy Cross, Muhammad Aziz Rahman.

**Data curation:** Ahmed Suparno Bahar Moni, Shalimar Abdullah, Mohammad Farris Iman Leong Bin Abdullah, Mohammed Shahjahan Kabir, Muhammad Aziz Rahman.

**Investigation:** Ahmed Suparno Bahar Moni, Shalimar Abdullah, Mohammad Farris Iman Leong Bin Abdullah, Mohammed Shahjahan Kabir.

**Methodology:** Ahmed Suparno Bahar Moni, Muhammad Aziz Rahman.

**Project administration:** Ahmed Suparno Bahar Moni, Muhammad Aziz Rahman.

**Resources:** Ahmed Suparno Bahar Moni.

**Software:** Muhammad Aziz Rahman.

**Supervision:** Muhammad Aziz Rahman.

**Writing – original draft:** Ahmed Suparno Bahar Moni, Mohammad Farris Iman Leong Bin Abdullah, Muhammad Aziz Rahman.

**Writing – review & editing:** Ahmed Suparno Bahar Moni, Sheikh M. Alif, Farhana Sultana, Masudus Salehin, Sheikh Mohammed Shariful Islam, Wendy Cross, Muhammad Aziz Rahman.

## References

1. Worldometer. COVID-19 Coronavirus Pandemic [Available from: <https://www.worldometers.info/coronavirus/>].
2. Sundarasan S, Chinna K, Kamaludin K, Nurunnabi M, Baloch GM, Khoshaim HB, et al. Psychological Impact of COVID-19 and Lockdown among University Students in Malaysia: Implications and Policy Recommendations. *Int J Environ Res Public Health*. 2020; 17(17). <https://doi.org/10.3390/ijerph17176206> PMID: 32867024
3. Elengoe A. COVID-19 Outbreak in Malaysia. *Osong Public Health Res Perspect*. 2020; 11(3):93–100. <https://doi.org/10.24171/j.phrp.2020.11.3.08> PMID: 32494567
4. Shah AUM, Safri SNA, Thevadas R, Noordin NK, Rahman AA, Sekawi Z, et al. COVID-19 outbreak in Malaysia: Actions taken by the Malaysian government. *Int J Infect Dis*. 2020; 97:108–16. <https://doi.org/10.1016/j.ijid.2020.05.093> PMID: 32497808
5. Reuters. Malaysia launches COVID-19 vaccination drive as PM gets first shot. Accessed on 23-Mar-2021 from <https://www.reuters.com/article/us-health-coronavirus-malaysia-idUSKBN2A00RX>
6. Wang Y, Kala MP, Jafar TH. Factors associated with psychological distress during the coronavirus disease 2019 (COVID-19) pandemic on the predominantly general population: A systematic review and meta-analysis. *PLoS One*. 2020; 15(12):e0244630. <https://doi.org/10.1371/journal.pone.0244630> PMID: 33370404
7. Rahman MA, Hoque N, Alif SM, Islam SMS, Banik B, Sharif A, et al. Factors Associated With Psychological Distress, Fear and Coping Strategies During the COVID-19 Pandemic in Australia. *Globalization and Health*. 2020; 16:95. <https://doi.org/10.1186/s12992-020-00624-w> PMID: 33032629
8. Smith L, Jacob L, Yakkundi A, McDermott D, Armstrong NC, Barnett Y, et al. Correlates of symptoms of anxiety and depression and mental wellbeing associated with COVID-19: a cross-sectional study of UK-based respondents. *Psychiatry Res*. 2020; 291:113138. <https://doi.org/10.1016/j.psychres.2020.113138> PMID: 32562931
9. Mazza C, Ricci E, Biondi S, Colasanti M, Ferracuti S, Napoli C, et al. A Nationwide Survey of Psychological Distress among Italian People during the COVID-19 Pandemic: Immediate Psychological Responses and Associated Factors. *Int J Environ Res Public Health*. 2020; 17(9). <https://doi.org/10.3390/ijerph17093165> PMID: 32370116
10. Ni MY, Yang L, Leung CMC, Li N, Yao XI, Wang YS, et al. Mental Health, Risk Factors, and Social Media Use During the COVID-19 Epidemic and Cordon Sanitaire Among the Community and Health Professionals in Wuhan, China: Cross-Sectional Survey. *Jmir Ment Health*. 2020; 7(5). <https://doi.org/10.2196/19009> PMID: 32365044
11. Aktekin M, Karaman T, Senol YY, Erdem S, Erengin H, Akaydin M. Anxiety, depression and stressful life events among medical students: a prospective study in Antalya, Turkey. *Med Educ*. 2001; 35(1):12–7. <https://doi.org/10.1046/j.1365-2923.2001.00726.x> PMID: 11123589

12. Thombs BD, Bonardi O, Rice DB, Boruff JT, Azar M, He C, et al. Curating evidence on mental health during COVID-19: A living systematic review. *J Psychosom Res*. 2020;110113. <https://doi.org/10.1016/j.jpsychores.2020.110113> PMID: 32354463
13. Gunnell D, Appleby L, Arensman E, Hawton K, John A, Kapur N, et al. Suicide risk and prevention during the COVID-19 pandemic. *Lancet Psychiatry*. 2020; 7(6):468–71. [https://doi.org/10.1016/S2215-0366\(20\)30171-1](https://doi.org/10.1016/S2215-0366(20)30171-1) PMID: 32330430
14. Xiao H, Zhang Y, Kong D, Li S, Yang N. The Effects of Social Support on Sleep Quality of Medical Staff Treating Patients with Coronavirus Disease 2019 (COVID-19) in January and February 2020 in China. *Med Sci Monit*. 2020; 26:e923549. <https://doi.org/10.12659/MSM.923549> PMID: 32132521
15. Ahorsu DK, Imani V, Lin CY, Timpka T, Brostrom A, Updegraff JA, et al. Associations Between Fear of COVID-19, Mental Health, and Preventive Behaviours Across Pregnant Women and Husbands: An Actor-Partner Interdependence Modelling. *Int J Ment Health Ad*. 2020.
16. Ahorsu DK, Lin CY, Pakpour AH. The Association Between Health Status and Insomnia, Mental Health, and Preventive Behaviors: The Mediating Role of Fear of COVID-19. *Gerontology and Geriatric Medicine*. 2020; 6.
17. Pramukti I, Strong C, Sitthimongkol Y, Setiawan A, Pandin MGR, Yen CF, et al. Anxiety and Suicidal Thoughts During the COVID-19 Pandemic: Cross-Country Comparative Study Among Indonesian, Taiwanese, and Thai University Students. *J Med Internet Res*. 2020; 22(12):e24487. <https://doi.org/10.2196/24487> PMID: 33296867
18. de Figueiredo CS, Sandre PC, Portugal LCL, Mazala-de-Oliveira T, Chagas LD, Raony I, et al. COVID-19 pandemic impact on children and adolescents' mental health: Biological, environmental, and social factors. *Prog Neuro-Psychoph*. 2021; 106.
19. Kalok A, Sharip S, Hafizz AMA, Zainuddin ZM, Shafiee MN. The Psychological Impact of Movement Restriction during the COVID-19 Outbreak on Clinical Undergraduates: A Cross-Sectional Study. *Int J Environ Res Public Health*. 2020; 17(22):8522. <https://doi.org/10.3390/ijerph17228522> PMID: 33212969
20. Kassim MAM, Pang NTP, Mohamed NH, Kamu A, Ho CM, Ayu F, et al. Relationship Between Fear of COVID-19, Psychopathology and Sociodemographic Variables in Malaysian Population. *Int J Ment Health Ad*. 2021.
21. OpenEpi. [Available from: [https://www.openepi.com/Menu/OE\\_Menu.htm](https://www.openepi.com/Menu/OE_Menu.htm).
22. Department of Statistics Malaysia Official Portal. [Available from: <https://www.dosm.gov.my/v1/>.
23. Yahaya SN, Wahab SFA, Yusoff MSB, Yasin MAM, Rahman MAA. Prevalence and associated factors of stress, anxiety and depression among emergency medical officers in Malaysian hospitals. *World J Emerg Med*. 2018; 9(3):178–86. <https://doi.org/10.5847/wjem.j.1920-8642.2018.03.003> PMID: 29796141
24. Shamsuddin K, Fadzil F, Ismail WS, Shah SA, Omar K, Muhammad NA, et al. Correlates of depression, anxiety and stress among Malaysian university students. *Asian J Psychiatr*. 2013; 6(4):318–23. <https://doi.org/10.1016/j.ajp.2013.01.014> PMID: 23810140
25. Furukawa TA, Kessler RC, Slade T, Andrews G. The performance of the K6 and K10 screening scales for psychological distress in the Australian National Survey of Mental Health and Well-Being. *Psychol Med*. 2003; 33(2):357–62. <https://doi.org/10.1017/s0033291702006700> PMID: 12622315
26. Ahorsu DK, Lin CY, Imani V, Saffari M, Griffiths MD, Pakpour AH. The Fear of COVID-19 Scale: Development and Initial Validation. *Int J Ment Health Addict*. 2020:1–9. <https://doi.org/10.1007/s11469-020-00270-8> PMID: 32226353
27. Sinclair VG, Wallston KA. The development and psychometric evaluation of the Brief Resilient Coping Scale. *Assessment*. 2004; 11(1):94–101. <https://doi.org/10.1177/1073191103258144> PMID: 14994958
28. Rahman MA, Salehin M, Islam SMS, Alif SM, Sultana F, Sharif A, et al. Reliability of the tools used to examine psychological distress, fear of COVID-19 and coping amongst migrants and non-migrants in Australia. *Int J Ment Health Nurs*. 2021. [Online ahead of print] <https://doi.org/10.1111/inm.12845> PMID: 33555128
29. Jurblum M, Ng CH, Castle DJ. Psychological consequences of social isolation and quarantine: Issues related to COVID-19 restrictions. *Aust J Gen Pract*. 2020; 49(12):778–83. <https://doi.org/10.31128/AJGP-06-20-5481> PMID: 33254205
30. Khanna RC, Honavar SG, Metla AL, Bhattacharya A, Maulik PK. Psychological impact of COVID-19 on ophthalmologists-in-training and practising ophthalmologists in India. *Indian J Ophthalmol*. 2020; 68(6):994–8. [https://doi.org/10.4103/ijo.IJO\\_1458\\_20](https://doi.org/10.4103/ijo.IJO_1458_20) PMID: 32461412
31. Cao W, Fang Z, Hou G, Han M, Xu X, Dong J, et al. The psychological impact of the COVID-19 epidemic on college students in China. *Psychiatry Res*. 2020; 287:112934. <https://doi.org/10.1016/j.psychres.2020.112934> PMID: 32229390

32. Brooks SK, Webster RK, Smith LE, Woodland L, Wessely S, Greenberg N, et al. The psychological impact of quarantine and how to reduce it: rapid review of the evidence. *Lancet*. 2020; 395(10227):912–20. [https://doi.org/10.1016/S0140-6736\(20\)30460-8](https://doi.org/10.1016/S0140-6736(20)30460-8) PMID: 32112714
33. Ahmed MZ, Ahmed O, Aibao Z, Hanbin S, Siyu L, Ahmad A. Epidemic of COVID-19 in China and associated Psychological Problems. *Asian J Psychiatr*. 2020; 51:102092. <https://doi.org/10.1016/j.ajp.2020.102092> PMID: 32315963
34. Mäkelä P, Raitasalo K, Wahlbeck K. Mental health and alcohol use: A cross-sectional study of the Finnish general population. *Eur J Public Health*. 2015; 25(2):25–31. <https://doi.org/10.1093/eurpub/cku133> PMID: 25192709
35. Guo Q, Zheng Y, Shi J, Wang J, Li G, Li C, et al. Immediate psychological distress in quarantined patients with COVID-19 and its association with peripheral inflammation: A mixed-method study. *Brain Behav Immun*. 2020; 88:17–27. <https://doi.org/10.1016/j.bbi.2020.05.038> PMID: 32416290
36. Zhang WR, Wang K, Yin L, Zhao WF, Xue Q, Peng M, et al. Mental Health and Psychosocial Problems of Medical Health Workers during the COVID-19 Epidemic in China. *Psychother Psychosom*. 2020; 89(4):242–50. <https://doi.org/10.1159/000507639> PMID: 32272480
37. Liu X, Luo WT, Li Y, Li CN, Hong ZS, Chen HL, et al. Psychological status and behavior changes of the public during the COVID-19 epidemic in China. *Infect Dis Poverty*. 2020; 9(1):58. <https://doi.org/10.1186/s40249-020-00678-3> PMID: 32471513
38. Lu W, Wang H, Lin Y, Li L. Psychological status of medical workforce during the COVID-19 pandemic: A cross-sectional study. *Psychiatry Res*. 2020; 288:112936. <https://doi.org/10.1016/j.psychres.2020.112936> PMID: 32276196
39. Rodriguez-Hidalgo AJ, Pantaleon Y, Dios I, Falla D. Fear of COVID-19, Stress, and Anxiety in University Undergraduate Students: A Predictive Model for Depression. *Front Psychol*. 2020; 11:591797. <https://doi.org/10.3389/fpsyg.2020.591797> PMID: 33224080
40. Wang Y, Di Y, Ye J, Wei W. Study on the public psychological states and its related factors during the outbreak of coronavirus disease 2019 (COVID-19) in some regions of China. *Psychol Health Med*. 2020; Epub ahead of print:1–10.
41. Cai W, Lian B, Song X, Hou T, Deng G, Li H. A cross-sectional study on mental health among health care workers during the outbreak of Corona Virus Disease 2019. *Asian J Psychiatr*. 2020; 51:102111. <https://doi.org/10.1016/j.ajp.2020.102111> PMID: 32361388
